# Supplementary material for: Downregulation of SETD5 Suppresses the Tumorigenicity of Hepatocellular Carcinoma Cells
Source: PubMed Central journal article supplement — Mol Cells. 2022 Aug 5;45(8):550–63. doi: 10.14348/molcells.2022.0009 (PMC9385566; doi:10.14348/molcells.2022.0009), 2022-08-05
Supplement: molce-45-8-550-supple1.pdf [file molce-45-8-550-supple1.pdf]

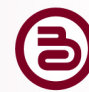

**Supplementary Table S1.** List of siRNA and shRNA target sequences used in this study

| siRNA                  | Sense                                                   | Antisense             |
|------------------------|---------------------------------------------------------|-----------------------|
| Negative siRNA control | CCTACGCCACCAATTCGT                                      | ACGAAATTGGTGGCGTAGG   |
| SETD5 siRNA-1          | CTGTATCCAGTGATCATGA                                     | TCATGATCACTGGATACAG   |
| SETD5 siRNA-2          | GACTAGAACTCAGCACCTA                                     | TAGGTGCTGAGTTCTAGTC   |
| shRNA                  | Name                                                    | Target sequence       |
| Negative control       | Mission pLKO.1-puro non-mammalian shRNA control: SHC002 | CAACAAGATGAAGAGCACCAA |
| SETD5 shRNA-1          | SETD5:TRCN0000253860                                    | CCGGTTGTGGGCAAACCTACT |
| SETD5 shRNA-2          | SETD5:TRCN0000253862                                    | CCGGCAACCGTGCTGCATCTA |

**Supplementary Table S2.** RT-PCR primers used in this study

| Gene  | Forward primer sequence (5' to 3') | Reverse primer sequence (5' to 3') |
|-------|------------------------------------|------------------------------------|
| SETD5 | CCCAGAACCCACCACAGAGG               | AGTTACTGCTGCCTTGCCCA               |
| PSMB8 | CACGGGTAGTGGGAACACTT               | GACAACGCCTCCAGAATAGC               |
| ICAM1 | GGCCTCAGTCAGTGTGA                  | AACCCCATTCAGCGTCA                  |
| MYLK3 | GTGGCTTGCCCCATTCTA                 | AACAAAGTCCTTGGCCTCCT               |
| DDX60 | CCCAGGGTCCAGGATTTTAT               | GAACAGTTGCTGCCACTTGA               |
| SSPN  | GCTCAGCAGGACCTTTGTTT               | GCCGCAGACCAAATTAAGAA               |
| PKM   | ATGTCGAAGCCCCATAGTGAA              | TGGGTGGTGAATCAATGTCCA              |
| ACTB  | AGAGCTACGAGCTGCCTGAC               | AGCACTGTGTTGGCGTACAG               |
| MDA5  | TGCAGTGTGCTAGCCTGTTT               | AGTCGGCACACTTCTTTTGC               |
